# Supplementary material for: Depth profiling by pulsed glow discharge time-of-flight mass spectrometry with a combined hollow cathode cell
Source: Royal Society of Chemistry journal article supplement (doi:10.1039/d0ja00088d), 2020-01-01
Supplement: d0ja00088d1.pdf [file d0ja00088d1.pdf]

---

SUPPLEMENTARY INFORMATION

**Depth profiling by pulsed glow discharge time-of-flight mass spectrometry with  
combined hollow cathode cell**

Anna Gubal, Victoria Chuchina, Yegor Lyalkin, Vladimir Mikhailovskii, Viktor  
Yakobson, Nikolay Solovyev, Alexander Ganeev

---

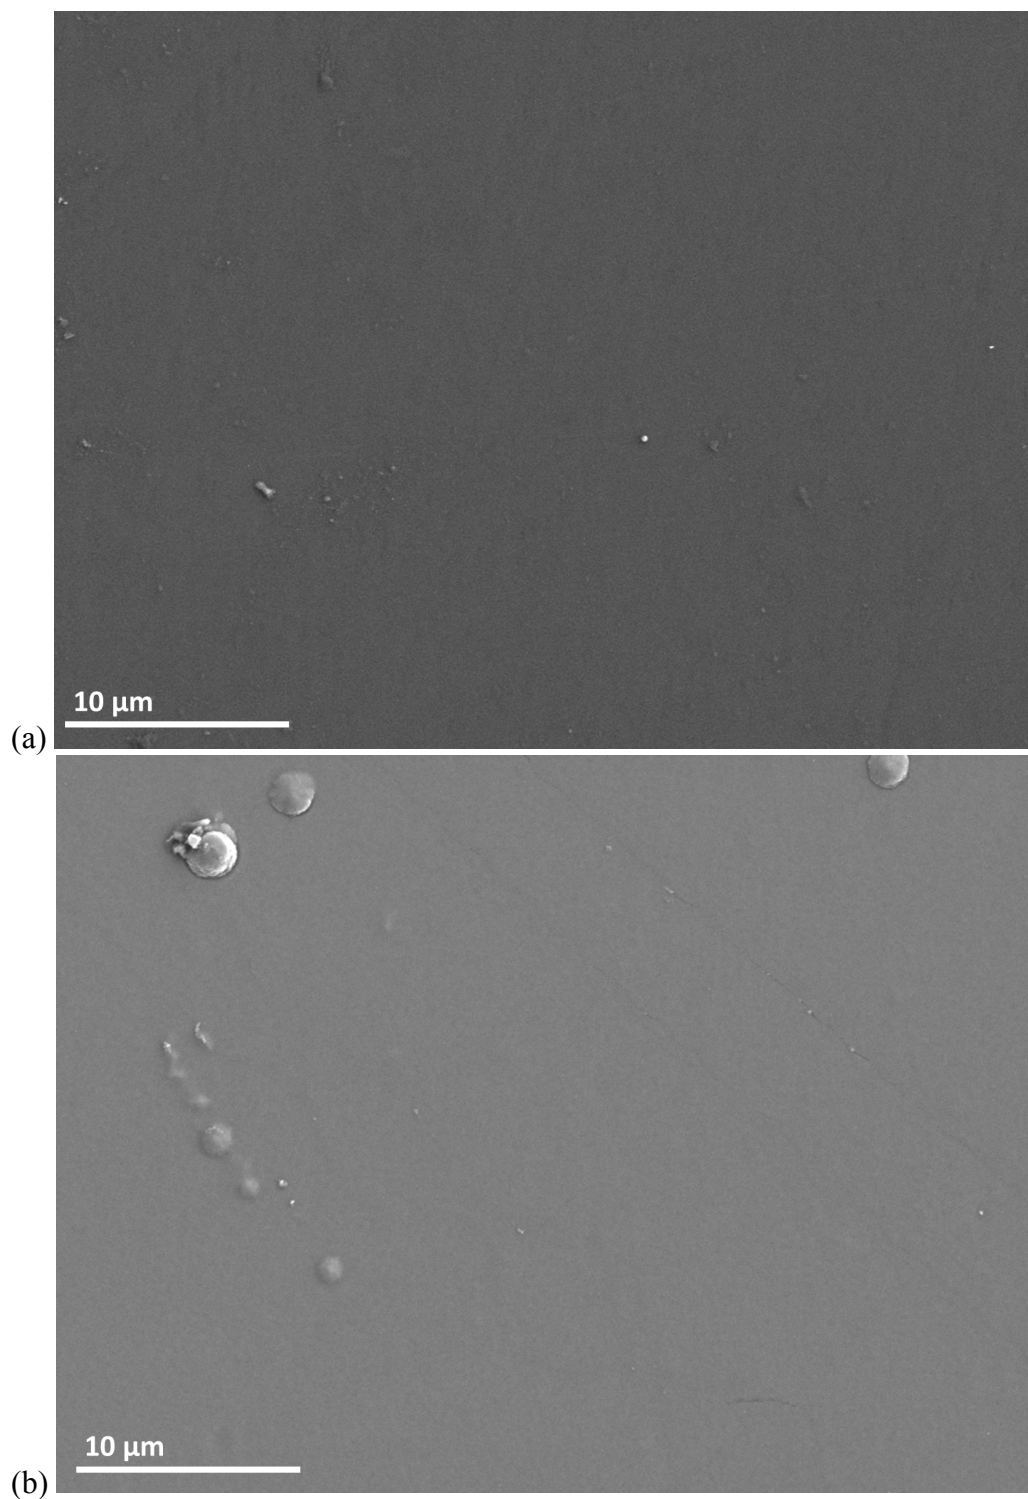

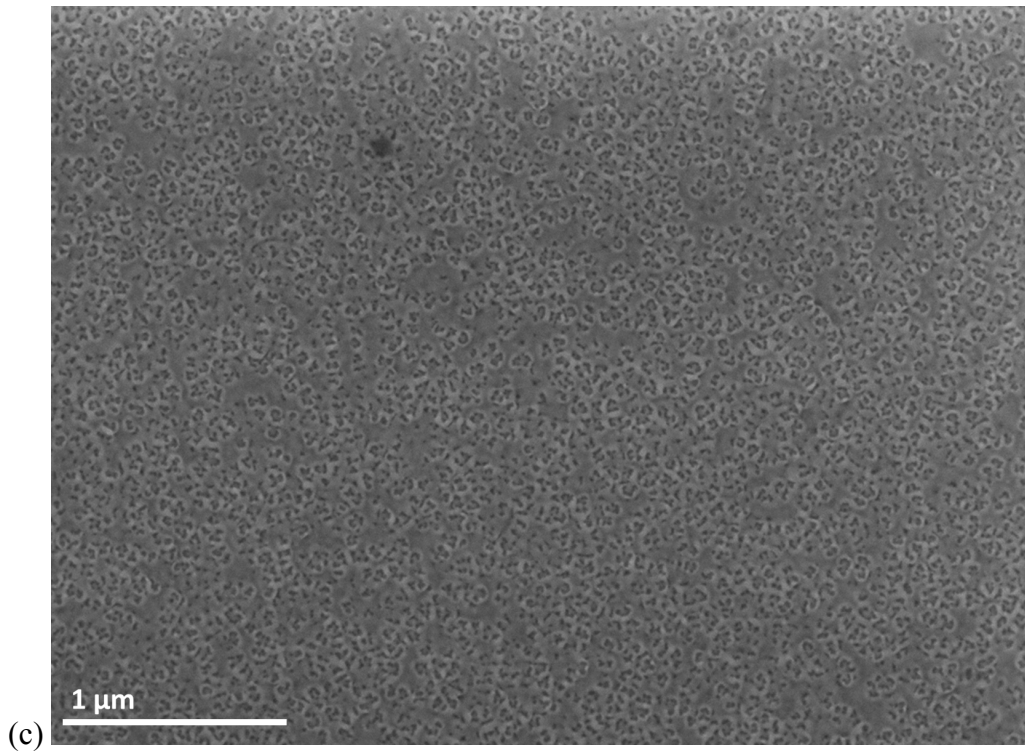

**Fig. S1** SEM-images of Si surface in different regions of the crater after the GD sputtering in Ta CHC cell: (a) – outer part of the crater (original surface), magnification 5000X; (b) – central part of the crater's bottom, magnification 5000X; (c) – central part of the crater's bottom, magnification 50000X.

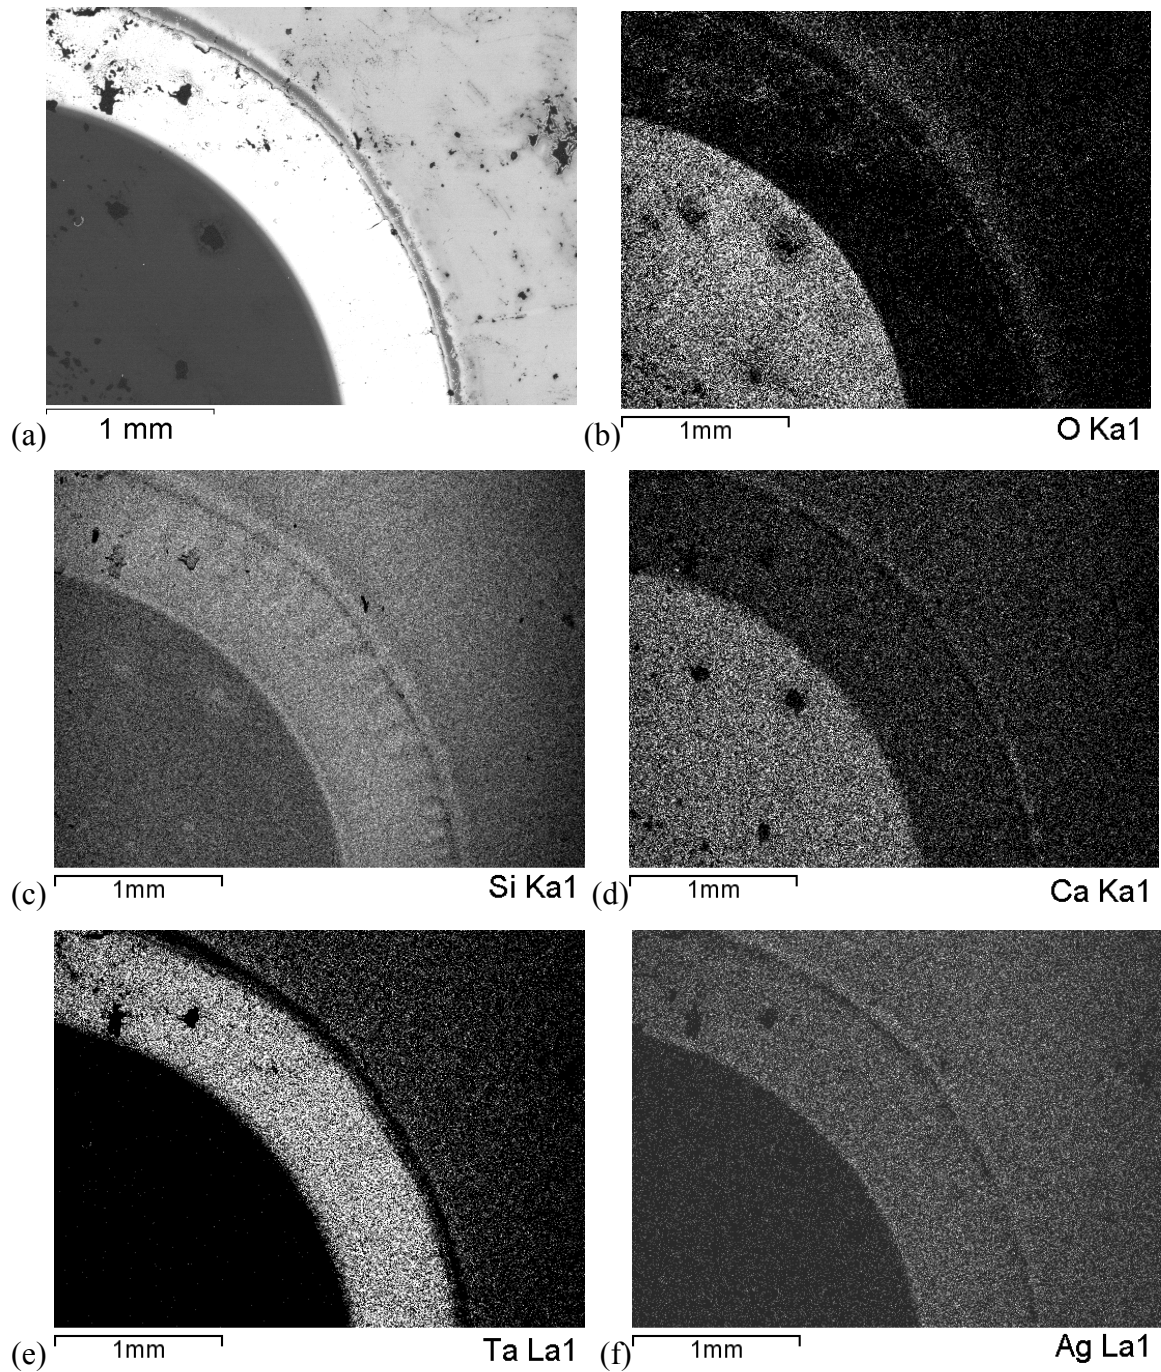

**Fig. S2** SEM EDX images of the glow discharge sputtering crater surface for the 650 nm silicon film on borosilicate glass preliminary covered with 170 nm Ta layer; auxiliary cathode made of Ta: (a) – SEM image of the part of the crater, (b), (c), (d), (e), (f) – EDX maps of the same area for O ( $K\alpha 1$ ), Si ( $K\alpha 1$ ), Ca ( $K\alpha 1$ ) (component of FIOLAX 8412 borosilicate glass), Ta ( $L\alpha 1$ ), and Ag ( $L\alpha 1$ ) emission lines, respectively.
